# Supplementary material
Source: MDPI journal article supplement (https://www.mdpi.com/2078-2489/13/7/336)
Supplement: s1 [file s1]

Archive with 1 entries (1 files):
- information-1751645-supplementary.pdf
